# Supplementary material
Source: HighWire-hosted journal article supplement (https://jitc.bmj.com/content/9/4/e001889)
Supplement: inline-supplementary-material-1 [file inline-supplementary-material-1.pdf]

Supplements to Böttcher M *et al*

Stroma promotes PD-L1 in CLL-cells

## Supplemental Material and Methods

### ***Animal material***

E $\mu$ -TCL1 mice on the C57BL/6J background were provided by Dr. Marco Herling (University of Cologne, Cologne, Germany). All animal experiments were performed upon approval and according to local regulations. Malignant B-cells were isolated using magnetic microbeads (Miltenyi biotec) for depletion of CD90.2<sup>+</sup> cells and subsequent enrichment of CD5<sup>+</sup> cells according to the manufacturer's protocols. Purity of the cells was always >90% as determined by multi-color flow cytometry. The murine stroma cell line M2-10B4 was purchased from ATCC (Manassas, VA).

### ***Cell culture***

#### *Human and murine co-culture*

The human stroma cell line HS-5 or primary mesenchymal stroma cells (pMSC) were seeded at a density of  $5 \times 10^4$  /ml in RPMI-1640 (Sigma-Aldrich) supplemented with 2 mM L-glutamine (Sigma-Aldrich), 10 % FCS (c.c.pro) and 40 U/ml Penicillin-Streptomycin (ThermoFisher Scientific) henceforth called R10<sup>+</sup> per well in a 24-well plate (Greiner bio-one). Cells were maintained at 37°C, 5% CO<sub>2</sub> for 24h. Subsequent, medium was exchanged to fresh R10<sup>+</sup> and CLL PBMCs (>75% B-CLL frequency for flow cytometry, >90% B-CLL frequency for gene expression analysis and ChIP) were seeded at a density of  $2 \times 10^6$  /ml (HS-5:CLL ratio = 1:40). Cultures were incubated for 1-6 days as detailed at 37°C, 5% CO<sub>2</sub>. For indicated experiments CLL cells were re-purified after co-culture using anti-CD90 magnetic microbeads (Miltenyi biotec) for stroma cell depletion according to the manufacturer's protocol.

Transwell experiments were similarly conducted with the stromal cells in the lower compartments separated from the CLL PBMCs in the upper chamber in volumes recommended by the manufacturer (Greiner bio-one). Cultures of CLL PBMCs with conditioned medium from HS-5 were set up in a similar way adding either 1 ml fresh R10<sup>+</sup> to the CLL cell suspension or 1 ml of HS-5 conditioned medium. HS-5 conditioned medium was prepared by incubating  $2 \times 10^6$  HS-5 cells per T75 flask in 20 ml R10<sup>+</sup> for 4 days. After a centrifugation step the cell-free medium was stored at -20°C.

Supplements to Böttcher M *et al*

## Stroma promotes PD-L1 in CLL-cells

For selected analyses HS-5 cells were cultured in absence and presence of 5  $\mu$ M Lenalidomide for 24h. Then, stroma cells were harvested, washed and seeded as described above.

The murine stroma cell line M2-10B4 was seeded at a density of  $5 \times 10^4$  /ml in R10<sup>+</sup> in a 96-well flat-bottom plate (Greiner bio-one) and cultured for 24h at 37°C, 5% CO<sub>2</sub>. Medium was exchanged to fresh R10<sup>+</sup> and freshly isolated CLL cells from the spleen of a E $\mu$ -TCL1 mouse were added at a density of  $5 \times 10^5$  /ml (M2-10B4:CLL ratio = 1:10). Cultures were incubated for 3 days at 37°C, 5% CO<sub>2</sub>.

For the treatment of CLL samples with Notch ligands recombinant human Jagged1, Jagged2, DLL1 and DLL4 (R&D Systems) were coated for 4h at 4°C in a 48-well flat-bottom plate at a concentration of 10  $\mu$ g/ml. Afterwards, CLL PBMCs were cultured for 1-6 days at a density of  $10^6$  cells/ml.

All inhibitors utilized in the cell culture experiments are listed in the Supplemental Table 3.

T-cell activation culture

CLL PBMCs were analyzed for T-cell frequency by flow cytometry prior to the seeding. PBMCs and magnetic-bead isolated T-cells (CD3 microbeads, human; Miltenyi biotec) were seeded at a density of  $10^6$  /ml in R10<sup>+</sup>. T-cells were stimulated using activation/expansion beads coated with anti-CD2/CD3/CD28 (Miltenyi biotec) at a ratio of 1:4. Samples were treated with anti-human CD274 (Thermo Fisher Scientific, clone MIH1) and the corresponding isotype as a control (mouse IgG1,  $\kappa$ ; Thermo Fisher Scientific) at a concentration of 10  $\mu$ g/ml. Samples were cultured for 72h at 37°C, 5% CO<sub>2</sub>.

CLL/T-cell co-culture

Human T-cells were isolated from CLL PBMCs using anti-CD3 magnetic beads (Miltenyi biotec) according to the manufacturer's instructions. The T-cell-depleted fraction was cultured for 3 days in absence/presence of HS-5 cells as described above. T-cells were maintained for the same time at a density of  $10^6$  /ml in R10<sup>+</sup> at 37°C, 5% CO<sub>2</sub>. CLL cells were re-purified from the stroma layer by anti-CD19 magnetic microbeads (Miltenyi biotec) according to the manufacturer's instructions. T-cells and CLL cells were seeded at a ratio of 1:1 in an autologous setup. Cultures were stimulated with anti-CD2/CD3/CD28 coated activation/expansion beads (Miltenyi biotec) at a bead:T-cell ratio of 1:8. In selected experiments samples were treated with anti-human CD274 (Thermo Fisher Scientific,

Supplements to Böttcher M *et al*

## Stroma promotes PD-L1 in CLL-cells

clone MIH1) and the corresponding isotype as a control (mouse IgG1,  $\kappa$ ; Thermo Fisher Scientific) at a concentration of 10  $\mu\text{g/ml}$ . Cultures were maintained for 48h at 37°C, 5% CO<sub>2</sub>.

Murine CLL/M2-10B4 co-cultures were setup as described above. Murine T-cells were isolated from the lymph nodes of the same donor mouse using the Pan T Cell Isolation Kit II, mouse (Miltenyi biotec) as outlined by the manufacturer. CLL cells were re-purified from the stroma layer by CD90 depletion (CD90.2 microbeads, Miltenyi biotec). T-cells and CLL cells were seeded at a ratio of 2:1 and stimulated with anti-CD3/CD28 coated activation/expansion beads (Miltenyi biotec) at a bead:T-cell ratio of 1:8. Cultures were maintained for 48h at 37°C, 5% CO<sub>2</sub>.

**Flow Cytometry and Sorting**

Cells were stained according to the manufacturer's recommendations using fluorochrome-coupled antibodies (Supplemental Table 2). For *ex vivo* analyses CLL and healthy donor (HD) PBMCs were used directly after density gradient isolation. Cells from the *in vitro* cultures were harvested in FACS tubes after the indicated incubation time. All samples were collected by centrifugation at 300x *g* for 5 min at 4°C. After washing with PBS, samples were stained with Zombie Aqua™ Fixable Viability Kit (Biolegend) for dead-cell discrimination according to manufacturer's instructions at a final dilution of 1:500. Samples were blocked with FcR Blocking Reagent, human (Miltenyi biotec) for 10 min at 4°C. Fluorochrome-coupled antibodies against surface proteins were directly added to the samples at recommended dilutions and incubated for 20 min at 4°C. Cells were either analyzed directly after washing (surface stainings) or further stained for intracellular proteins (intracellular stainings) using the Leucoperm™ fixation/permeabilization system (Biorad) according to the product manual.

Glucose uptake was analyzed by the use of 6-NBDG (6-(N-(7-Nitrobenz-2-oxa-1,3-diazol-4-yl)amino)-6-Deoxyglucose; ThermoFisher Scientific). Cells were washed in PBS and glucose-free medium by centrifugation (300 x *g*, 5 min, 4°C) and resuspended in glucose-free medium containing 0.3 mM 6-NBDG. Samples were incubated for 15 min at 37°C, 5% CO<sub>2</sub> and subsequently recorded after two washing steps.

Absolute cell count / $\mu\text{l}$  was determined using 123count eBeads (ThermoFisher Scientific).

Supplements to Böttcher M *et al*

## Stroma promotes PD-L1 in CLL-cells

All samples were recorded on a BD FACS Canto II after appropriate fluorescence compensation.

Obtained data was analyzed using FlowJo V9.5 or V10 (FlowJo LLC).

Fluorescence-activated cell sorting (FACS) was performed at the Core Unit Cell Sorting of the University Erlangen-Nuremberg using fluorochrome-conjugated antibodies (Supplemental Table 2) according manufacturer's recommendations.

**Quantitative real-time PCR**

Samples were lysed after culture and RNA was prepared using the innuPREP RNA Mini Kit 2.0 (analytik jena) as recommended by the manufacturer. Synthesis of cDNA was performed using the SuperScript™ II Reverse Transcriptase (ThermoFisher Scientific) together with random decamers (ThermoFisher Scientific), dNTP-Set 1 (Carl Roth), and RNaseOUT™ Recombinant Ribonuclease Inhibitor (ThermoFisher Scientific) according to the protocol provided to the SuperScript™ II Reverse Transcriptase.

Quantitative real-time PCR reactions were set up using the Luna® Universal qPCR Master Mix (New England Biolabs) and QuantiTect Primer Assays (Qiagen, see Supplemental Table 4) in accordance to the manufacturer's recommendations. PCR reactions were run on a Rotor-Gene Q machine (Qiagen) and relative gene expression levels were quantified using the 2-standard method.

For analysis of micro-RNAs (miRs) total RNA was extracted using the miRNeasy Micro Kit (Qiagen) with on-column DNase digestion (RNase-free DNase Set, Qiagen) according to the manufacturer's protocol. Relative expression was assessed using the miScript II RT Kit (Qiagen) with the recommended protocol for mature miRs and according miScript Primer Assays (Qiagen, see Supplemental Table 4) together with the miScript SYBR® Green PCR Kit (Qiagen) using miR16 and miR484 for normalization.

**Gene set enrichment analysis**

Gene Set Enrichment Analysis was performed using the public dataset GSE21029<sup>1</sup> on the GSEA software provided by the Broad Institute (MIT, CA, USA) with gene sets available by the Molecular Signatures Database v6.2<sup>2</sup>.

Supplements to Böttcher M *et al*

Stroma promotes PD-L1 in CLL-cells

***Chromatin immuno-precipitation (ChIP)***

For chromatin immune-precipitations (ChIP) both primary CLL PBMCs (B-CLL cell frequency >90%) as well as CLL cell lines (Mec-1, Eheb) were used. ChIPs were performed using the ChIP-IT® Express Enzymatic Kit (Active motif) according to the manufacturer's protocol. Precipitation was conducted with a c-Myc (D3N8F) Rabbit mAb (Cell Signaling Technology) and the corresponding normal rabbit IgG as control (Cell Signaling Technology). Precipitated samples were analyzed by use of quantitative real-time PCR for DNA fragments spanning regions around the PD-L1 promoter using 5 different primer pairs as indicated in Supplemental Table 5.

Supplements to Böttcher M *et al*

Stroma promotes PD-L1 in CLL-cells

## Supplemental Information

Supplemental Table 1: Patient's characteristics

| Case | Sex | Age [Yrs] | Case | Sex | Age [Yrs] | Case                 | Sex | Age [Yrs] |
|------|-----|-----------|------|-----|-----------|----------------------|-----|-----------|
| 1    | M   | 60        | 77   | F   | 71        | 155                  | M   | 70        |
| 5    | F   | 79        | 80   | M   | 59        | 160                  | F   | 51        |
| 6    | M   | 71        | 81   | M   | 79        | 162                  | F   | 68        |
| 9    | M   | 73        | 85   | M   | 72        | 166                  | M   | 79        |
| 10   | M   | 80        | 86   | M   | 71        | 169                  | F   | 71        |
| 11   | F   | 77        | 90   | F   | 86        | 170                  | M   | 53        |
| 15   | M   | 75        | 91   | M   | 83        | 172                  | M   | 34        |
| 18   | M   | 52        | 92   | M   | 59        | 174                  | M   | 65        |
| 22   | M   | 67        | 94   | M   | 52        | 178                  | M   | 67        |
| 23   | M   | 55        | 99   | F   | 78        | 179                  | M   | 84        |
| 30   | M   | 91        | 103  | M   | 67        | 183                  | F   | 74        |
| 32   | F   | 81        | 104  | F   | 53        | 188                  | M   | 40        |
| 34   | F   | 73        | 111  | F   | 91        | 192                  | F   | 87        |
| 37   | M   | 52        | 113  | M   | 76        | 193                  | M   | 62        |
| 38   | M   | 68        | 115  | F   | 81        | 198                  | F   | 82        |
| 40   | M   | 82        | 118  | M   | 75        | 199                  | M   | 59        |
| 41   | F   | 71        | 119  | F   | 63        | 200                  | F   | 65        |
| 42   | M   | 64        | 121  | M   | 40        | 202                  | M   | 74        |
| 43   | M   | 68        | 131  | F   | 76        | 203                  | F   | 82        |
| 49   | M   | 82        | 135  | M   | 43        | 208                  | F   | 76        |
| 50   | M   | 72        | 136  | M   | 56        | 209                  | M   | 75        |
| 51   | M   | 75        | 137  | F   | 80        | matched-pair donors: |     |           |
| 57   | M   | 65        | 138  | F   | 76        | WOT0173              | M   | 80        |
| 61   | F   | 74        | 142  | F   | 78        | WET0405              | M   | 81        |
| 63   | F   | 71        | 143  | M   | 72        | AA02P/597-FA         | M   | 54        |
| 65   | F   | 76        | 144  | M   | 77        | AA03P/593-PCM        | M   | 52        |
| 66   | F   | 68        | 147  | F   | 81        | AA04P/370-CECM       | M   | 63        |
| 67   | M   | 77        | 149  | M   | 83        | AA07P/611-FA         | M   | 67        |
| 72   | F   | 55        | 151  | F   | 49        | AA09P/629-RE         | F   | 84        |
| 74   | F   | 48        | 153  | M   | 65        | 77-137/138           | M   | 49        |
| 75   | M   | 68        | 154  | M   | 68        | 121-230/231          | M   | 80        |

Supplements to Böttcher M *et al*

Stroma promotes PD-L1 in CLL-cells

Supplemental Table 2: Antibodies for Flow Cytometry

| Antibody      | Fluorochrome   | Clone   | Manufacturer  | Order No.      |
|---------------|----------------|---------|---------------|----------------|
| <b>human</b>  |                |         |               |                |
| CD3           | PE/Cy7         | SK7     | Biolegend     | 344816         |
| CD3           | Pacific Blue   | UCHT1   | Biolegend     | 300431         |
| CD4           | FITC           | OKT4    | Biolegend     | 317408         |
| CD5           | FITC           | UCHT2   | Biolegend     | 300606         |
| CD5           | APC            | UCHT2   | Biolegend     | 300612         |
| CD14          | PerCP/Cy5.5    | HCD 14  | Biolegend     | 325622         |
| CD16          | BV421          | 3G8     | Biolegend     | 302038         |
| CD19          | PE/Cy7         | H1B19   | Biolegend     | 302216         |
| CD19          | APC/Cy7        | SI25C1  | Biolegend     | 363010         |
| CD25          | FITC           | M-A251  | Biolegend     | 356106         |
| CD25          | APC            | M-A251  | Biolegend     | 356110         |
| CD45          | APC            | HI30    | Biolegend     | 304037         |
| CD45          | PerCP/Cy5.5    | 2D1     | Biolegend     | 368504         |
| CD69          | PerCP/Cy5.5    | FN50    | Biolegend     | 310926         |
| CD137         | PE/Cy7         | 4B4-1   | Biolegend     | 309818         |
| CD137         | APC/Cy7        | 4B4-1   | Biolegend     | 309830         |
| CD184 (CXCR4) | PE             | 12G5    | Biolegend     | 306505         |
| CD274         | PE             | 29E.2A3 | Biolegend     | 329706         |
| CD274         | APC            | 29E.2A3 | Biolegend     | 329708         |
| EZH2          | AlexaFluor 647 | 11/EZH2 | BD            | 563491         |
| Glut-1        | APC            | 202915  | R&D Systems   | FAB1418A       |
| IFN $\gamma$  | APC/Cy7        | 4S.B3   | Biolegend     | 502530         |
| Ki67          | PerCP/Cy5.5    | Ki-67   | Biolegend     | 350520         |
| Myc           | FITC           | 9E10    | abcam         | ab117599       |
| Myc           | AlexaFluor 488 | 9E10    | Biorad        | MCA2200A488    |
| TNF $\alpha$  | APC            | MAb11   | Biolegend     | 502912         |
| <b>mouse</b>  |                |         |               |                |
| CD3           | eFluor450      | 17A2    | Thermo Fisher | 48-0032-82     |
| CD5           | FITC           | 53-7.3  | Biolegend     | 100605         |
| CD19          | PE/Cy7         | 6D5     | Biolegend     | 115519         |
| CD25          | FITC           | 3C7     | Biolegend     | 101907         |
| CD69          | APC/Cy7        | H1.2F3  | Biolegend     | 104525         |
| CD137         | APC            | 17B5    | Biolegend     | 106110         |
| CD274         | PE             | MIH7    | Biolegend     | 155404         |
| EZH2          | BV421          | 11/EZH2 | BD            | 562963         |
| Myc           | AlexaFluor647  | 9E10    | NovusBio      | NB600-302AF647 |

Supplemental Table 3: Inhibitors

| Compound                    | Manufacturer  | Order No. | Concentration in culture |
|-----------------------------|---------------|-----------|--------------------------|
| 10058-F4                    | Selleckchem   | S7153     | 50 $\mu$ M               |
| BMS-708163                  | Selleckchem   | S1262     | 8 $\mu$ M                |
| 3-Deazaneplanocin A (DZNeP) | Selleckchem   | S7120     | 10 $\mu$ M               |
| EPZ011989                   | Selleckchem   | S7805     | 50 $\mu$ M               |
| Lenalidomide                | Sigma-Aldrich | SML2283   | 5 $\mu$ M                |
| Pomalidomide                | Selleckchem   | S1567     | 5 $\mu$ M                |
| Thalidomide                 | Selleckchem   | S1193     | 5 $\mu$ M                |

Supplements to Böttcher M *et al*

Stroma promotes PD-L1 in CLL-cells

Supplemental Table 4: Primer for quantitative real-time PCR

| Gene          | Quantitect Primer Assay | Name                                   | NCBI Ref. Seq.                                                 |
|---------------|-------------------------|----------------------------------------|----------------------------------------------------------------|
| <b>ACTB</b>   | QT01680476              | Actin, beta                            | NM_001101, XM_006715764                                        |
| <b>CCNB1</b>  | QT00006615              | Cyclin B1                              | NM_031966                                                      |
| <b>CD274</b>  | QT00082775              | Programmed death ligand 1              | NM_014143, XM_006716759                                        |
| <b>DLL1</b>   | QT00057631              | Delta Like Canonical Notch Ligand 1    | NM_005618, XM_005266934, XM_006725014                          |
| <b>DLL3</b>   | QT00021791              | Delta Like Canonical Notch Ligand 3    | NM_016941, NM_203486                                           |
| <b>EZH2</b>   | QT00054614              | Enhancer of zeste homolog 2            | NM_004456, NM_001203249, NM_001203247, NM_001203248, NM_152998 |
| <b>HK2</b>    | QT00013209              | Hexokinase 2                           | NM_000189                                                      |
| <b>HES1</b>   | QT00039648              | Hes Family BHLH Transcription Factor 1 | NM_005524                                                      |
| <b>JAG1</b>   | QT00031948              | Jagged 1                               | NM_000214                                                      |
| <b>LDHA</b>   | QT00001687              | lactate dehydrogenase A                | NM_001135239, NM_001165416, NM_001165415, NM_005566            |
| <b>MYC</b>    | QT00035406              | MYC Proto-Oncogene                     | NM_002467                                                      |
| <b>miR16</b>  | MS00008813              | hsa-miR-16-2-3p                        | MIMAT0004518                                                   |
| <b>miR26a</b> | MS00029239              | hsa-miR-26a-5p                         | MIMAT0000082                                                   |
| <b>miR101</b> | MS00008372              | hsa-miR-101-3p                         | MIMAT0000099                                                   |

Supplemental Table 5: *CD274* primer for ChIP

| # | fw sequence             | rev sequence            | product length |
|---|-------------------------|-------------------------|----------------|
| 1 | TGGACTGACATGTTTCACCTTCT | CAAGGCAGCAAATCCAGTTT    | 148 bp         |
| 2 | TGATGCTAGGCTGGAGGTCTG   | TGATGCTAGGCTGGAGGTCTG   | 121 bp         |
| 3 | TGATCAGCAACACTATTTGGGA  | TGTTAGGTATCAGATTGTTGCCA | 142 bp         |
| 4 | ACAGGGCAGGTTCTACTAGGT   | TGCCACAGCCACATAAACT     | 191 bp         |
| 5 | CGCAAATCACTGAGCAGCAA    | GCAGTGTTCAGGGTCTACCT    | 113 bp         |



Supplements to Böttcher M *et al*

Stroma promotes PD-L1 in CLL-cells

## Supplemental Figures

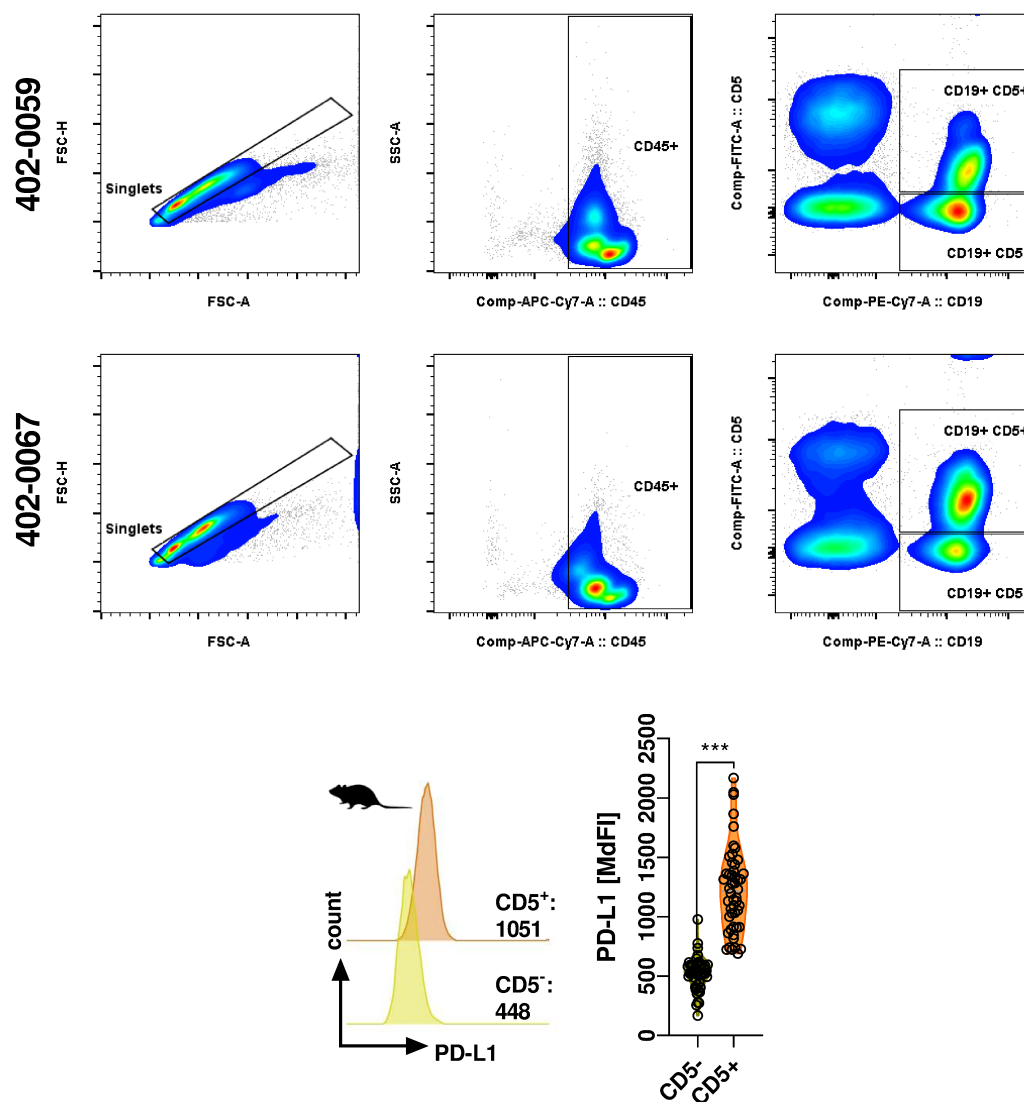

**Supplemental Figure 1:** Top: Gating strategy for malignant CD5<sup>+</sup> and non-malignant CD5<sup>-</sup> CD19<sup>+</sup> lymphocytes in peripheral blood from two different Eμ-TCL1 mice (402-0059, 402-0067). Bottom: PD-L1 expression was analyzed *ex vivo* on the surface of non-malignant (CD5<sup>-</sup>) and malignant (CD5<sup>+</sup>) CD19<sup>+</sup> lymphocytes from the blood of 5 month old Eμ-TCL1 mice by flow cytometry. The left histogram shows one representative example (numbers indicating median fluorescence intensity [MFI]) and the right graph summarizes the values from 50 animals. \*\*\* p<0.001

Supplements to Böttcher M *et al*

Stroma promotes PD-L1 in CLL-cells

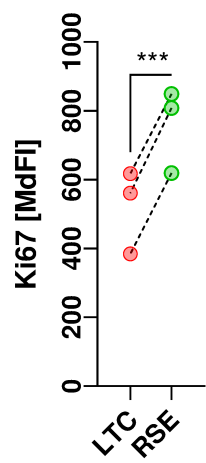

**Supplemental Figure 2:** Proliferation as analyzed by Ki67 staining in flow cytometry in LTCs and RSEs (n=3) corresponding to Figure 1B. \*\*\* p<0.001

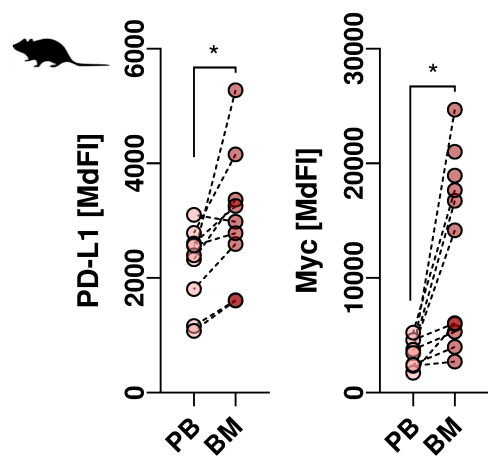

**Supplemental Figure 3:** Surface expression of PD-L1 (left, n=9) and intracellular levels of c-Myc (right, n=11) were analyzed by flow cytometry in CD19<sup>+</sup> CD5<sup>+</sup> CLL cells in matched pairs of PB and BM of Eμ-TCL1 mice. \* p<0.05

Supplements to Böttcher M *et al*

Stroma promotes PD-L1 in CLL-cells

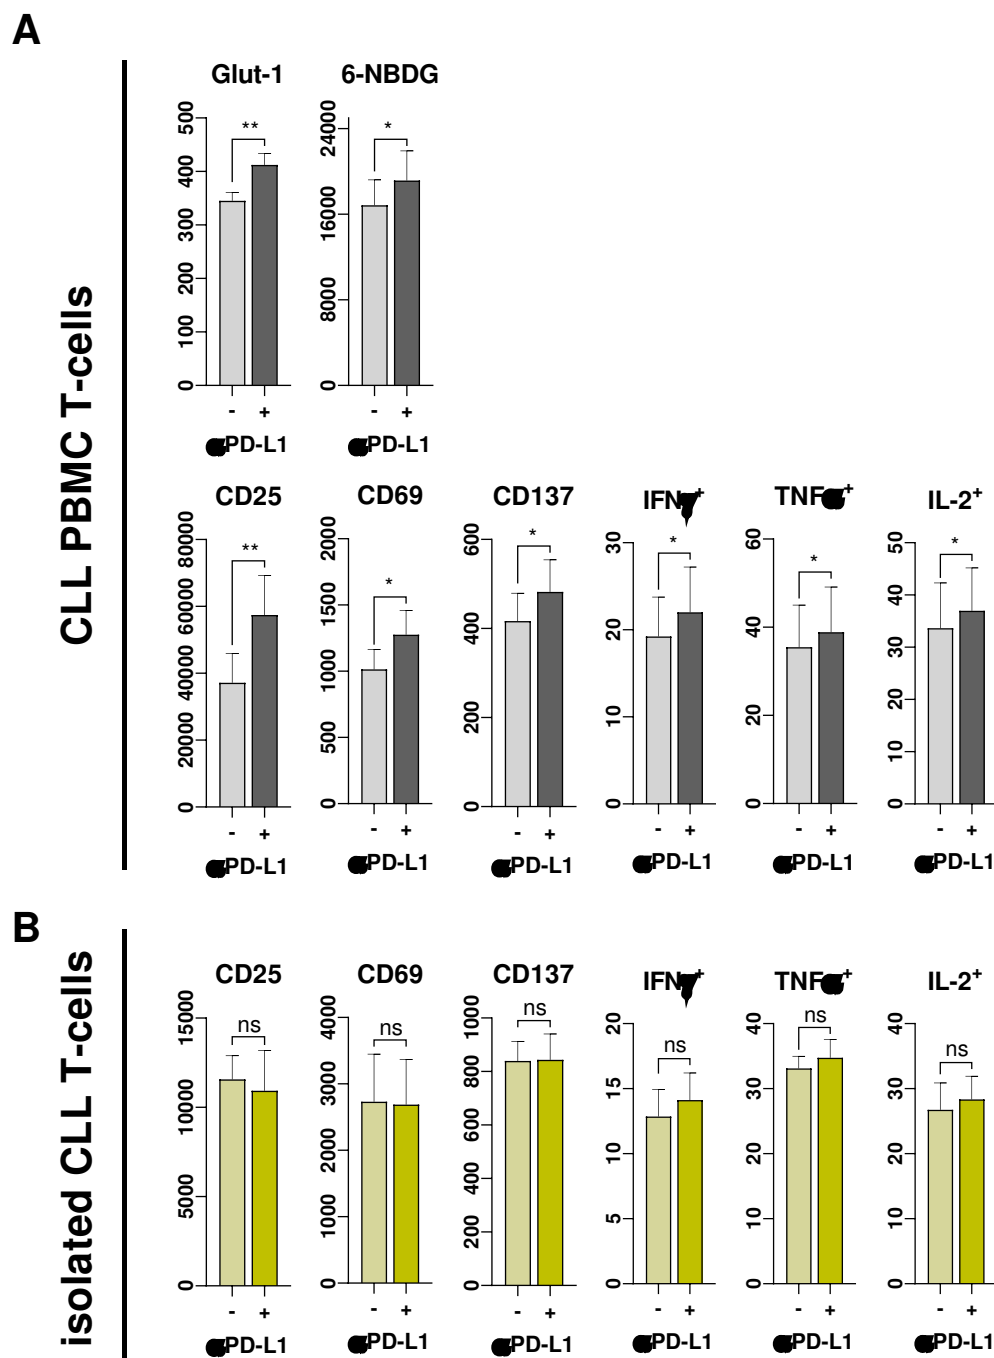

**Supplemental Figure 4:** CLL PBMCs (A, grey) or isolated CLL T-cells (B, yellow) were stimulated with anti-CD2/CD3/CD28 coated activation expansion beads (T-cell:bead ratio = 1:2) for 72 h in absence (-, light grey/yellow) or presence (+, dark grey/yellow) of 10  $\mu$ g/ml of anti-PD-L1 antibody. The corresponding IgG isotype was used as control (-, light grey/yellow). Afterwards, T-cells were exemplarily analyzed for their metabolic competence and activation by means of flow cytometry staining for surface level of Glut-1 (n=6) and glucose uptake (n=6, utilizing the fluorescent glucose analog 6-NBDG), as well as CD25 (grey n=9, yellow n=5), CD69 (n=6), CD137 (n=5), IFN $\gamma$  (n=5), TNF $\alpha$  (n=4), and IL-2 (grey n=4, yellow n=6). Error bars represent the standard error mean. \* p<0.05, \*\* p<0.01, ns not significant

Supplements to Böttcher M *et al*

Stroma promotes PD-L1 in CLL-cells

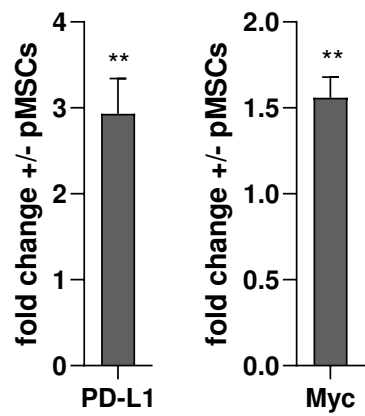

**Supplemental Figure 5:** CLL PBMCs were cultured in absence/presence of pMSCs for 3 days. Protein levels of surface PD-L1 (left, n=6) and intracellular Myc (right, n=6) were analyzed by flow cytometry. Values are depicted as the fold change between presence (+) and absence (-) of stroma.

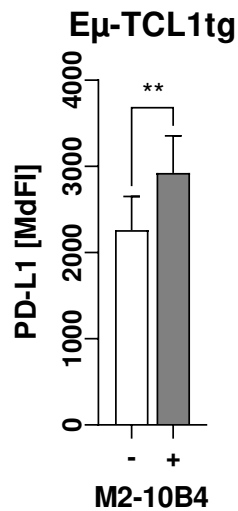

**Supplemental Figure 6:** Murine CLL cells isolated from the spleen of Eμ-TCL1 mice were cultured in absence (-, white) or presence (+, grey) of the murine BM stroma cell line M2-10B4 for 72h. Surface levels of PD-L1 on CD19<sup>+</sup> CD5<sup>+</sup> lymphocytes were determined by flow cytometry (n=5). Error bars represent the standard error mean. \* p<0.05, \*\* p<0.01, \*\*\* p<0.001

Supplements to Böttcher M *et al*

Stroma promotes PD-L1 in CLL-cells

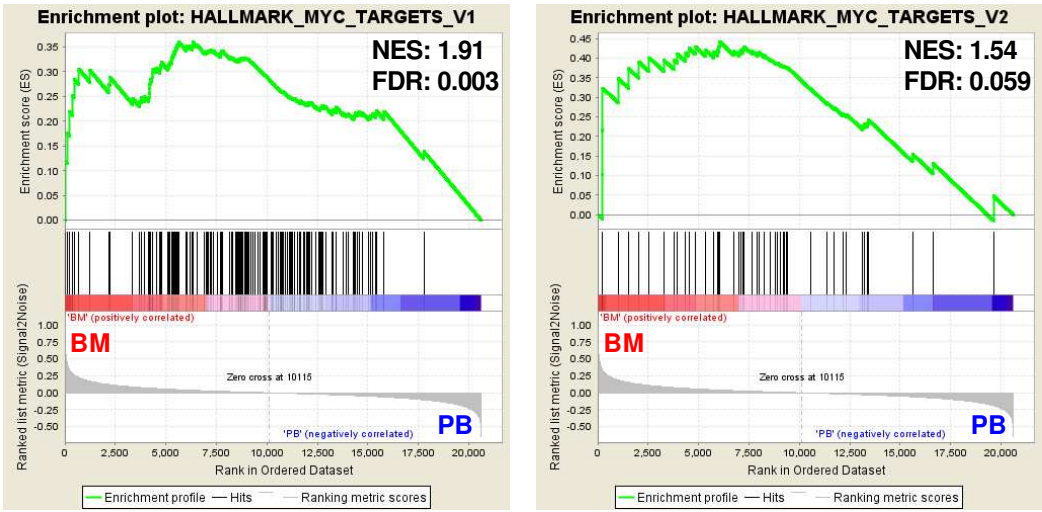

**Supplemental Figure 7:** Gene expression data from a public dataset (GSE21029) including samples from CLL BM and PB (n=26) were subjected to gene set enrichment analysis. Genes of the Hallmark\_Myc\_Targets\_V1 and HALLMARK\_MYC\_TARGETS\_V2 are depicted with the normalized enrichment score (NES) and the false discovery rate (FDR).

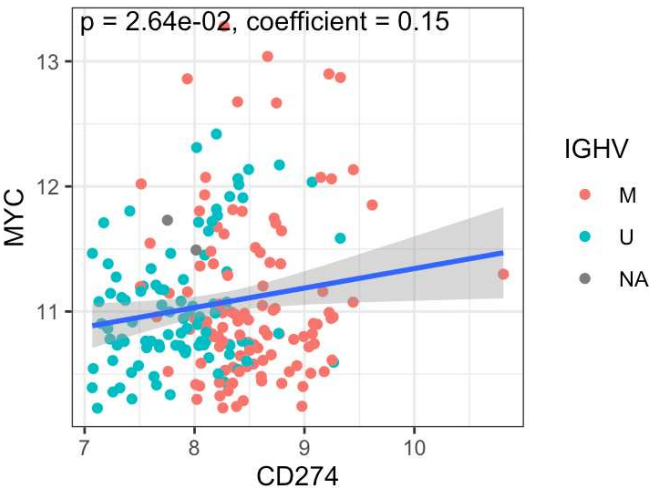

**Supplemental Figure 8:** Human CLL cells were analyzed for the pairwise correlation of CD274 and MYC expression (shown as log2 RNAseq counts) depicting IGHV-mutated (M, red, n=110) and unmutated (U, green, n=94) CLL cases. CLL PBMcs were processed and sequenced as previously described<sup>3</sup>. NA: IGHV data not available

Supplements to Böttcher M *et al*

Stroma promotes PD-L1 in CLL-cells

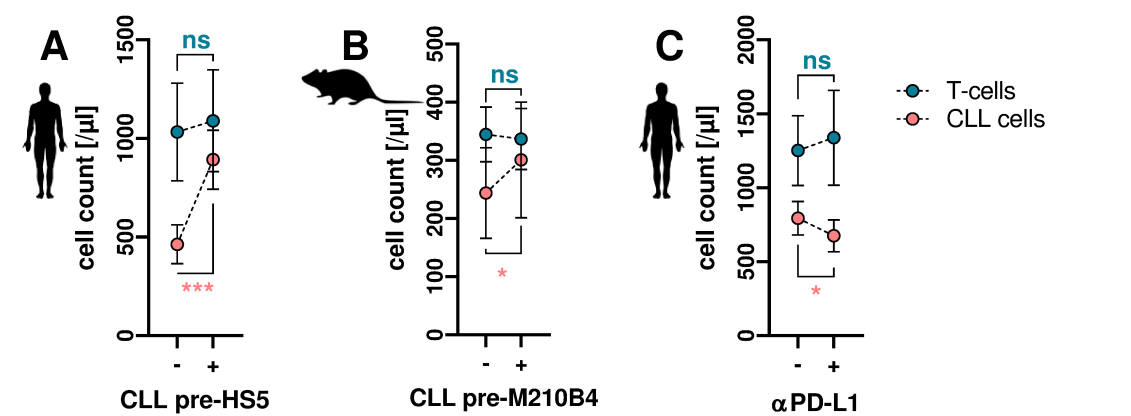

**Supplemental Figure 9 (corresponding to Figure 2):** Human (A, n=9) and murine (B, n=4) T-cells were co-cultured with CLL cells either untreated (-) or pre-educated by bone marrow stromal contact (+; HS-5 or M2-10B4 respectively). Samples were analyzed for CLL and T-cell count  $\mu\text{L}$  by flow cytometry. In selected experiments (C, n=5) T-cells co-cultured with stroma-educated CLL-cells were additionally treated with a PD-L1 blocking antibody and corresponding isotype control as described in materials and methods. \* p<0.05, \*\*\* p<0.001, ns not significant

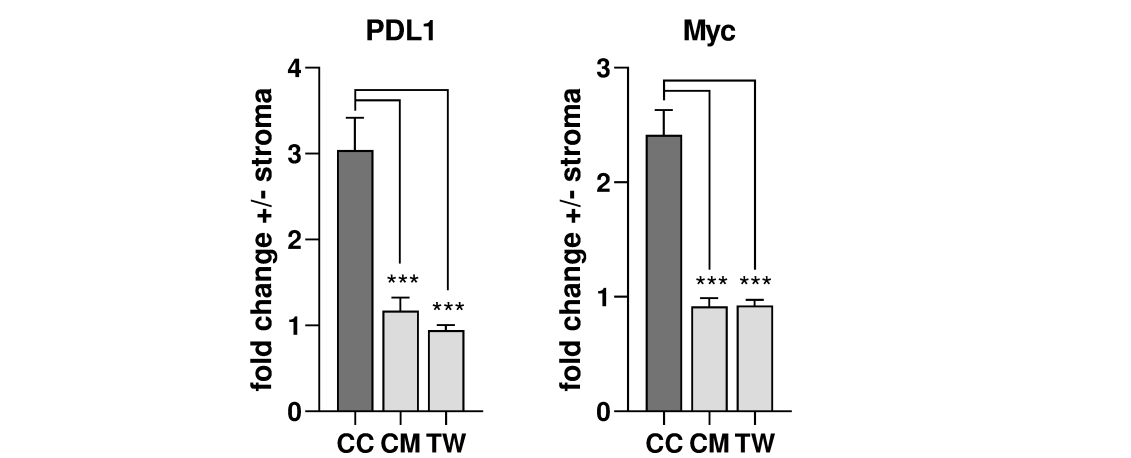

**Supplemental Figure 10:** CLL PBMCs were cultured for 3 days either alone, in presence of HS-5 cells (CC), with conditioned medium from HS-5 cells (CM) or together with HS-5 cells separated by a transwell (TW). Protein levels of surface PD-L1 (n=3-9) and intracellular Myc (n=3-9) were analyzed by flow cytometry and depicted as fold change of presence (+) and absence (-) of stroma. Error bars depict the standard error mean. \*\*\*p<0.001

Supplements to Böttcher M *et al*

Stroma promotes PD-L1 in CLL-cells

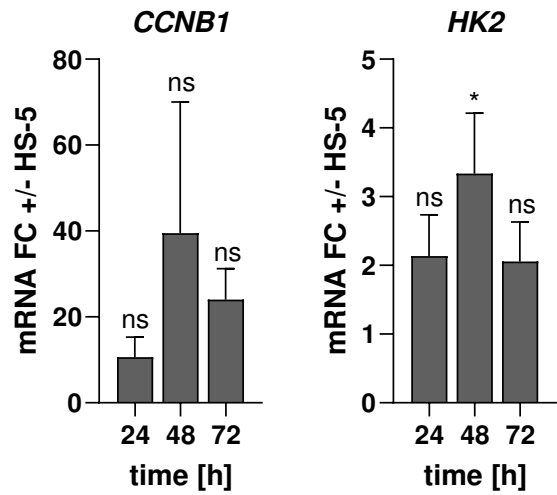

**Supplemental Figure 11:** Total RNA was extracted from CLL cells cultured in absence/presence of HS-5 stroma cells after indicated times and quantified for *CCNB1* (n=3) and *HK2* (n=6-9) gene expression by real-time PCR. Relative gene expression values are depicted as the fold change (FC) +/- stroma. Error bars represent the standard error mean. \* p<0.05, ns: not significant

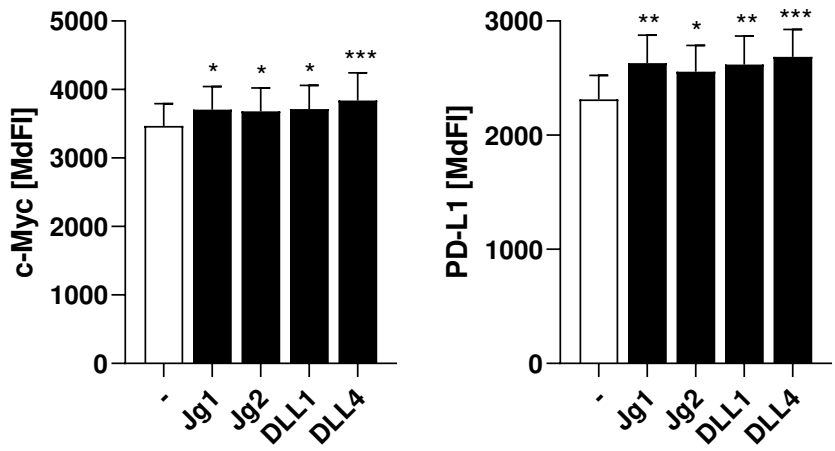

**Supplemental Figure 12:** Induction of c-Myc and PD-L1 by recombinant human Notch ligands. CLL-patient derived PBMCs were treated for 1-6 days with respective recombinant Notch ligands coated to a 48-well flat-bottom plate at a concentration of 10 µg/ml. Intracellular levels of c-Myc and surface expression of PD-L1 were determined by means of flow cytometry (n=6). Error bars represent the standard error mean. \* p<0.05, \*\* p<0.01, \*\*\* p<0.001

Supplements to Böttcher M *et al*

Stroma promotes PD-L1 in CLL-cells

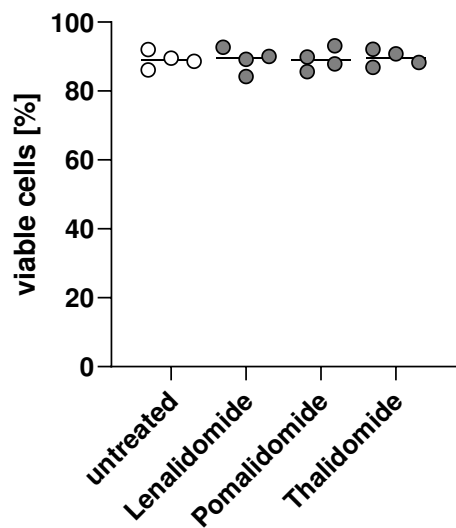

**Supplemental Figure 13:** HS-5 cells were culture for 24h in absence (untreated) or presence of 5  $\mu$ M IMiDs (Lenalidomide, Pomalidomide, Thalidomide). Afterwards, the frequency of viable cells amongst all was assessed by flow cytometry using Zombie Aqua™ Fixable Viability Kit (Biolegend).



Supplements to Böttcher M *et al*

## Stroma promotes PD-L1 in CLL-cells

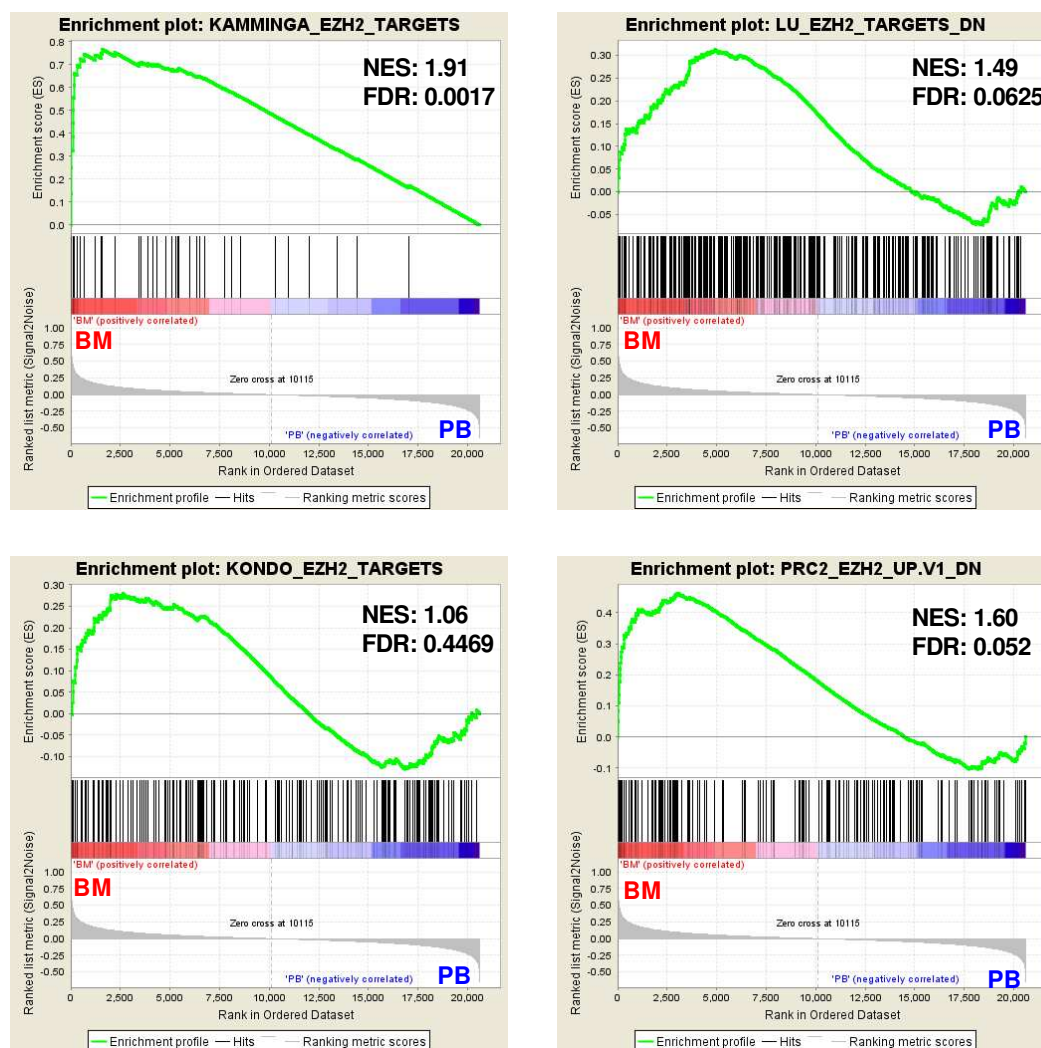

**Supplemental Figure 14:** Gene expression data from a public dataset (GSE21029<sup>1</sup>) including samples from CLL BM and PB (n=26) were subjected to gene set enrichment analysis<sup>2</sup>. Genes of the gene sets KAMMINGA-EZH2\_TARGETS<sup>4</sup>, LU\_EZH2\_TARGETS\_DN<sup>5</sup>, KONDO\_EZH2\_TARGETS<sup>6</sup>, and PRC2\_EZH2\_UP.V1\_DN<sup>7</sup> from the MSigDB<sup>8</sup> are depicted with the corresponding normalized enrichment score (NES) and the false discovery rate (FDR).

Supplements to Böttcher M *et al*

Stroma promotes PD-L1 in CLL-cells

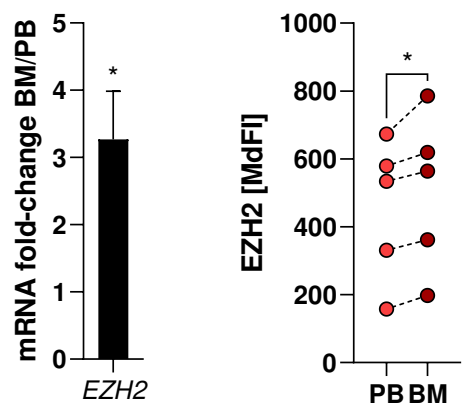

**Supplemental Figure 15:** Total RNA was prepared from CD19<sup>+</sup> lymphocytes isolated from matched-pairs of human CLL PB and BM. Relative gene expression of *EZH2* was quantified by real-time PCR and is depicted as the fold-change between BM and PB (left, n=7). Intracellular levels of EZH2 were analyzed by flow cytometry in CD19<sup>+</sup> lymphocytes in the same matched-pairs of PB and BM showing the median fluorescence intensity (MdFI). Error bars represent the standard error mean. \* p<0.05

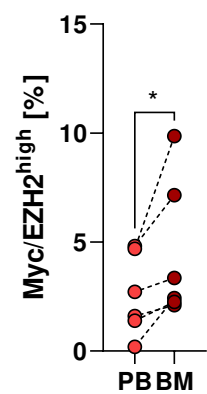

**Supplemental Figure 16:** The Myc/EZH2<sup>high</sup> subpopulation was analyzed by flow cytometry in CD19<sup>+</sup> CLL cells *ex vivo* in peripheral blood (PB) and bone marrow (BM) derived patient samples (n=6). \* p<0.05

Supplements to Böttcher M *et al*

Stroma promotes PD-L1 in CLL-cells

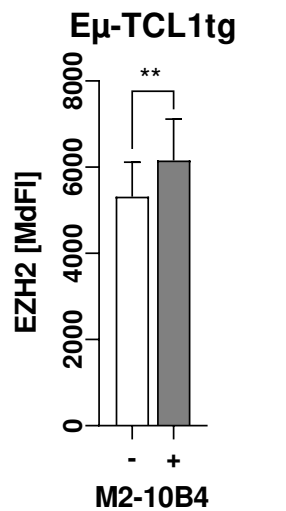

**Supplemental Figure 17:** Murine CLL cells isolated from the spleen of Eμ-TCL1 mice were cultured in absence (-, white) or presence (+, grey) of the murine BM stroma cell line M2-10B4 for 72h. Intracellular levels of EZH2 in CD19<sup>+</sup> CD5<sup>+</sup> lymphocytes were determined by flow cytometry (n=4). Error bars represent the standard error mean. \* p<0.05, \*\* p<0.01, \*\*\* p<0.001

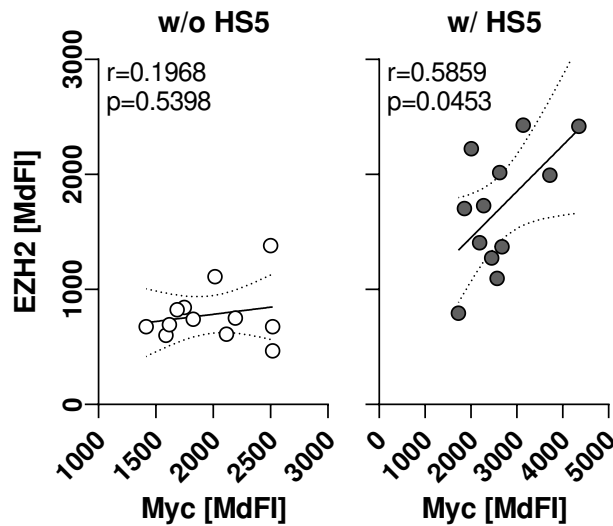

**Supplemental Figure 18:** Protein levels of EZH2 and Myc as determined by flow cytometry (based on the median fluorescence intensity [MdfI]) were subjected to a Pearson correlation analysis of CLL cells cultured in absence (w/o, white circles, n=12) or presence (w/, grey circles, n=12) HS-5 stroma cells for 3 days.

Supplements to Böttcher M *et al*

Stroma promotes PD-L1 in CLL-cells

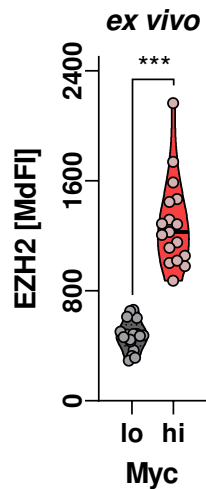

**Supplemental Figure 19:** CLL PBMCs were analyzed *ex vivo* for their Myc content in CD19<sup>+</sup> lymphocytes by flow cytometry. Samples were gated on the 15%-lowest (black) and 15%-highest (red) Myc expressing cells (as shown in Fig.2E). Within these gates, intracellular levels of EZH2 were semi-quantified based on the median fluorescence intensity (MdfI) by flow cytometry (n=17). \*\*\* p<0.001

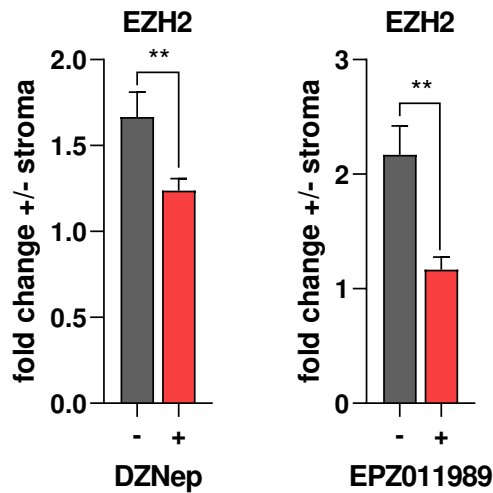

**Supplemental Figure 20:** CLL PBMCs were cultured on HS-5 BM stroma for 3 days in absence (grey) or presence (red) of the EZH2 inhibitors DZNep (10  $\mu$ M) and EPZ011989 (50  $\mu$ M). Protein levels of intracellular EZH2 were analyzed by flow cytometry and are depicted as the fold change +/- stroma. Error bars show the standard error mean. \*\* p<0.01

Supplements to Böttcher M *et al*

Stroma promotes PD-L1 in CLL-cells

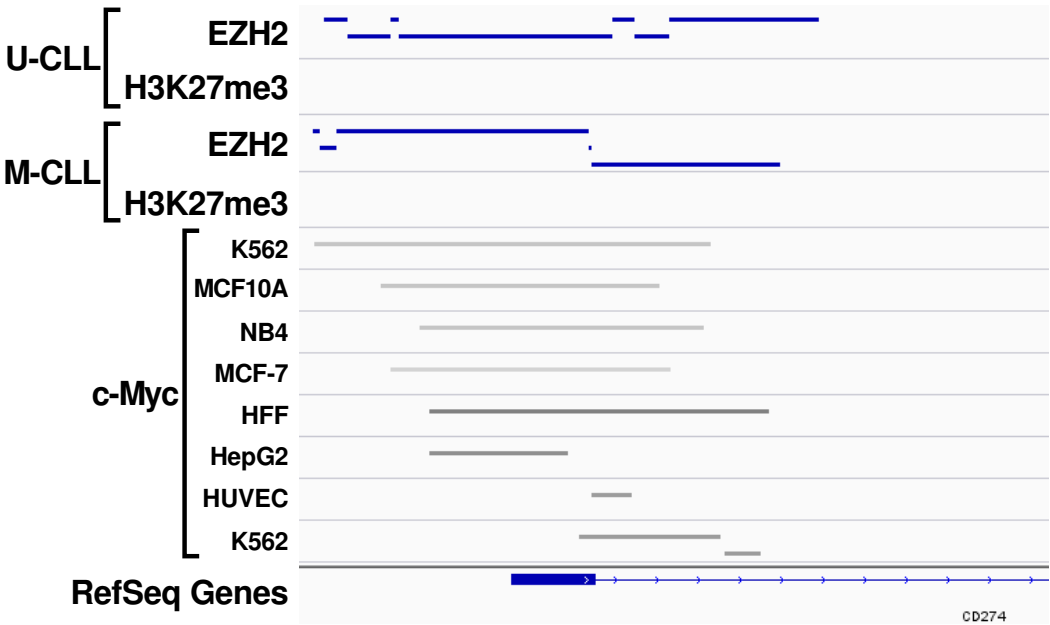

**Supplemental Figure 21:** Chromatin immunoprecipitation (ChIP) data from a public dataset (GSE115772<sup>9</sup>) as well as the ENCODE database were analyzed in the integrative genome viewer (IGV) for occupancy of EZH2, tri-methylated lysine 27 at histone 3 (H3K27me3) and c-Myc at the promoter region of *CD274* (RefSeq Genes). Data is shown for *IGHV* unmutated CLL (U-CLL), *IGHV* mutated CLL (M-CLL), as well as different cancer cell lines (K562, MCF10A, NB4, MCF-7, HFF, HepG2, HUVEC).

Supplements to Böttcher M *et al*

Stroma promotes PD-L1 in CLL-cells

## Supplemental References

1. Herishanu Y, Perez-Galan P, Liu D, et al. The lymph node microenvironment promotes B-cell receptor signaling, NF-kappaB activation, and tumor proliferation in chronic lymphocytic leukemia. *Blood* 2011;**117**(2):563-74.
2. Subramanian A, Tamayo P, Mootha VK, et al. Gene set enrichment analysis: a knowledge-based approach for interpreting genome-wide expression profiles. *Proceedings of the National Academy of Sciences of the United States of America* 2005;**102**(43):15545-50.
3. Lu J, Böttcher M, Walther T, et al. Energy metabolism is co-determined by genetic variants in chronic lymphocytic leukemia and influences drug sensitivity. *Haematologica* 2019;**104**(9):1830-40.
4. Kamminga LM, Bystrykh LV, de Boer A, et al. The Polycomb group gene Ezh2 prevents hematopoietic stem cell exhaustion. *Blood* 2006;**107**(5):2170-9.
5. Lu C, Han HD, Mangala LS, et al. Regulation of tumor angiogenesis by EZH2. *Cancer cell* 2010;**18**(2):185-97.
6. Kondo Y, Shen L, Cheng AS, et al. Gene silencing in cancer by histone H3 lysine 27 trimethylation independent of promoter DNA methylation. *Nature genetics* 2008;**40**(6):741-50.
7. Bracken AP, Dietrich N, Pasini D, et al. Genome-wide mapping of Polycomb target genes unravels their roles in cell fate transitions. *Genes & development* 2006;**20**(9):1123-36.
8. Liberzon A, Subramanian A, Pinchback R, et al. Molecular signatures database (MSigDB) 3.0. *Bioinformatics* 2011;**27**(12):1739-40.
9. Koslali ST, Morsy MHA, Papakonstantinou N, et al. EZH2 upregulates the PI3K/AKT pathway through IGF1R and MYC in clinically aggressive chronic lymphocytic leukaemia. *Epigenetics* 2019;**14**(11):1125-40.
